# Supplementary material
Source: Research Square preprint supplement (doi:10.21203/rs.3.rs-10190263/v1)
Supplement: Supplementary file 1 [file 4313b576559da31da35b6651.docx]

Table S1

*Missing data comparison based on pretest outcome.*

| Variable at pretest (reporter) | Missing group | | Present group | | t-test | | Effect Size | |
| --- | --- | --- | --- | --- | --- | --- | --- | --- |
|  | *M* (*SD*) | *n* | *M* (*SD*) | *n* | *t*(*df*) | *p* | *d* | 95% CI |
| Aggressive behavior (P) | 14.41 (8.36) | 17 | 14.10 (9.00) | 48 | 0.12 (63) | .902 | 0.04 | [−0.52, 0.59] |
| Rule-Breaking behavior (P) | 9.71 (5.31) | 17 | 9.38 (5.07) | 47 | 0.22 (62) | .825 | 0.06 | [−0.49, 0.62] |
| Cohesion (Y) | 5.00 (2.85) | 20 | 4.83 (2.29) | 46 | 0.26 (64) | .794 | 0.07 | [−0.46, 0.60] |
| Conflict (Y) | 4.00 (2.64) | 20 | 4.34 (2.43) | 47 | −0.51 (65) | .610 | −0.14 | [−0.66, 0.39] |
| Cohesion (P) | 6.18 (2.19) | 17 | 5.98 (2.55) | 48 | 0.28 (63) | .777 | 0.08 | [−0.47, 0.63] |
| Conflict (P) | 3.94 (2.28) | 17 | 3.96 (2.33) | 48 | −0.03 (63) | .979 | −0.01 | [−0.56, 0.55] |
| Social support (Y) | 2.74 (0.76) | 21 | 2.92 (0.79) | 47 | −0.86 (66) | .395 | −0.23 | [−0.74, 0.29] |
| Trust (Y) | 34.47 (8.61) | 19 | 33.87 (8.11) | 46 | 0.27 (63) | .789 | 0.07 | [−0.46, 0.61] |
| Communication (Y) | 26.47 (7.31) | 19 | 27.30 (7.43) | 46 | −0.41 (63) | .682 | −0.11 | [−0.65, 0.42] |
| Alienation (Y) | 15.26 (5.98) | 19 | 15.00 (4.76) | 47 | 0.19 (64) | .851 | 0.05 | [−0.48, 0.58] |

Note. Y = youth-report; P = parent-report. Missing group consists of those cases that had missing on either all mediator or outcome change scores. Missing group = 0, Present group = 1.

Table S1

*Results from single mediator models with behavioral variables as mediators and short-term change in family functioning as outcome.*

| Mediator /  Outcome  (respondent) | *n* | a-path () | *p* | b-path (ΔM→ΔY) | *p* | d-path (Mavg→ΔY) | *p* | a*b-path (Indirect Effect) | Boot 95% CI | c-path (Total effect) | *p* | c′-path (Direct effect) | *p* |
| --- | --- | --- | --- | --- | --- | --- | --- | --- | --- | --- | --- | --- | --- |
| Δ Aggressive behavior | | | | | | | | | | | | | |
| Cohesion (Y) | 40 | –4.58 | <.001 | –0.12 | .030 | –0.01 | .806 | 0.56 | [0.07, 1.08] | 0.65 | .137 | 0.09 | .853 |
| Cohesion (P) | 46 | –4.20 | <.001 | –0.22 | <.001 | –0.02 | .670 | 0.93 | [0.31, 1.61] | 0.57 | .170 | –0.36 | .350 |
| Conflict (Y) | 40 | –4.58 | <.001 | 0.09 | .081 | 0.09 | .080 | –0.40 | [–1.02, 0.12] | –0.18 | .650 | 0.22 | .607 |
| Conflict (P) | 46 | –4.20 | <.001 | 0.19 | <.001 | 0.13 | <.001 | –0.79 | [–1.47, –0.16] | –0.50 | .133 | 0.29 | .307 |
| Social support (Y) | 40 | –4.58 | <.001 | 0.00 | .814 | –0.02 | .271 | –0.02 | [–0.15, 0.10] | 0.14 | .192 | 0.16 | .219 |
| Trust (Y) | 40 | –4.58 | <.001 | 0.07 | .740 | –0.28 | .206 | –0.32 | [–2.33, 1.62] | 1.00 | .534 | 1.32 | .482 |
| Communication (Y) | 40 | –4.58 | <.001 | 0.12 | .503 | –0.27 | .137 | –0.53 | [–2.26, 1.00] | 1.08 | .421 | 1.60 | .296 |
| Alienation (Y) | 40 | –4.58 | <.001 | 0.03 | .794 | 0.08 | .501 | –0.14 | [–1.37, 0.74] | –1.08 | .236 | –0.93 | .388 |
| Δ Rule-breaking behavior | | | | | | | | | | | | | |
| Cohesion (Y) | 40 | –1.75 | .025 | –0.20 | .029 | 0.01 | .926 | 0.35 | [0.01, 0.76] | 0.65 | .137 | 0.30 | .503 |
| Cohesion (P) | 45 | –1.87 | .008 | –0.29 | .001 | 0.09 | .279 | 0.54 | [0.10, 1.22] | 0.56 | .186 | 0.01 | .971 |
| Conflict (Y) | 40 | –1.75 | .025 | 0.16 | .052 | 0.09 | .223 | –0.27 | [–0.68, 0.01] | –0.18 | .650 | 0.10 | .798 |
| Conflict (P) | 45 | –1.87 | .008 | 0.17 | .016 | 0.12 | .072 | –0.32 | [–0.87, –0.03] | –0.49 | .151 | –0.17 | .614 |
| Social support (Y) | 40 | –1.75 | .025 | –0.02 | .338 | 0.01 | .824 | 0.04 | [–0.03, 0.12] | 0.14 | .192 | 0.10 | .384 |
| Trust (Y) | 40 | –1.75 | .025 | –0.30 | .394 | –0.20 | .553 | 0.52 | [–0.79, 1.58] | 1.00 | .534 | 0.48 | .783 |
| Communication (Y) | 40 | –1.75 | .025 | –0.26 | .368 | –0.16 | .579 | 0.46 | [–0.91, 1.70] | 1.08 | .421 | 0.62 | .668 |
| Alienation (Y) | 40 | –1.75 | .025 | 0.06 | .749 | –0.07 | .727 | –0.11 | [–0.80, 0.45] | –1.08 | .236 | –0.96 | .331 |

Note. Unstandardized estimates. Y = youth report; P = parent report. ΔM = within-participant change in the mediator; ΔY = within-participant change in the outcome; Mavg = person-mean mediator level (grand-mean centered). a-path = the average within-participant change in the mediator (). b-path = association between change in the mediator (ΔM) and change in the outcome (ΔY), adjusting for the person-mean mediator level (Mavg); d-path = association between the person-level mediator (Mavg) and change in the outcome (ΔY), adjusting for ΔM. c-path = total within-participant change in the outcome. c′-path = remaining within-participant change in the outcome after adjusting for ΔM and Mavg. a*b-path = portion of within-participant outcome change statistically associated with mediator change (with 95% bootstrap confidence intervals).

Table S3

*Results from single mediator models with behavioral variables as mediators and long-term change in family functioning as outcome.*

| Mediator /  Outcome  (respondent) | *n* | a-path () | *p* | b-path (ΔM→ΔY) | *p* | d-path  (Mavg→ΔY) | *p* | a*b-path (Indirect Effect) | Boot 95% CI | c-path (Total effect) | *p* | c′-path (Direct effect) | *p* |
| --- | --- | --- | --- | --- | --- | --- | --- | --- | --- | --- | --- | --- | --- |
| Δ Aggressive behavior | | | | | | | | | | | | | |
| Cohesion (Y) | 35 | –4.86 | <.001 | –0.15 | .012 | –0.14 | .020 | 0.72 | [0.12, 1.44] | 1.83 | <.001 | 1.11 | .035 |
| Cohesion (P) | 41 | –4.51 | <.001 | –0.21 | <.001 | –0.06 | .187 | 0.94 | [0.29, 1.66] | 1.02 | .022 | 0.09 | .842 |
| Conflict (Y) | 36 | –4.69 | .001 | 0.10 | .095 | –0.02 | .772 | –0.46 | [–1.21, 0.32] | –1.03 | .025 | –0.57 | .267 |
| Conflict (P) | 41 | –4.51 | <.001 | 0.19 | <.001 | 0.07 | .106 | –0.85 | [–1.65, –0.11] | –1.15 | .005 | –0.30 | .427 |
| Social support (Y) | 35 | –4.80 | .001 | –0.06 | .011 | –0.07 | .005 | 0.28 | [0.05, 0.54] | 0.05 | .813 | –0.23 | .243 |
| Trust (Y) | 37 | –4.65 | <.001 | 0.14 | .516 | –0.27 | .206 | –0.65 | [–2.82, 1.46] | 4.03 | .016 | 4.67 | .017 |
| Communication (Y) | 37 | –4.65 | <.001 | 0.08 | .674 | –0.22 | .277 | –0.39 | [–2.70, 1.60] | 2.46 | .105 | 2.85 | .112 |
| Alienation (Y) | 38 | –4.50 | <.001 | 0.08 | .567 | 0.02 | .897 | –0.35 | [–1.57, 0.54] | –1.74 | .084 | –1.39 | .245 |
| Δ Rule-breaking behavior | | | | | | | | | | | | | |
| Cohesion (Y) | 35 | –2.46 | .002 | –0.12 | .299 | –0.12 | .284 | 0.29 | [–0.25, 0.95] | 1.83 | <.001 | 1.54 | .009 |
| Cohesion (P) | 41 | –2.10 | .005 | –0.15 | .130 | 0.03 | .740 | 0.32 | [–0.05, 1.05] | 1.02 | .022 | 0.71 | .143 |
| Conflict (Y) | 35 | –2.46 | .002 | 0.06 | .578 | –0.06 | .584 | –0.15 | [–0.94, 0.43] | –0.97 | .037 | –0.82 | .130 |
| Conflict (P) | 41 | –2.07 | .005 | 0.09 | .330 | 0.10 | .268 | –0.18 | [–0.79, 0.13] | –1.15 | .005 | –0.97 | .027 |
| Social support (Y) | 34 | –2.47 | .002 | –0.08 | .079 | –0.02 | .613 | 0.20 | [0.00, 0.56]a | 0.05 | .790 | –0.15 | .508 |
| Trust (Y) | 37 | –2.35 | .002 | 0.04 | .917 | –0.01 | .987 | –0.10 | [–2.51, 1.49] | 4.03 | .016 | 4.12 | .036 |
| Communication (Y) | 37 | –2.35 | .002 | –0.00 | .992 | 0.06 | .868 | 0.01 | [–2.37, 2.12] | 2.46 | .105 | 2.45 | .170 |
| Alienation (Y) | 37 | –2.35 | .002 | 0.13 | .599 | –0.12 | .629 | –0.31 | [–1.47, 0.10] | –1.70 | .099 | –1.39 | .247 |

Note. Unstandardized estimates. Y = youth report; P = parent report. ΔM = within-participant change in the mediator; ΔY = within-participant change in the outcome; Mavg = person-mean mediator level (grand-mean centered). a-path = the average within-participant change in the mediator (). b-path = association between change in the mediator (ΔM) and change in the outcome (ΔY), adjusting for the person-mean mediator level (Mavg). d-path = association between the person-level mediator (Mavg) and change in the outcome (ΔY), adjusting for ΔM. c-path = total within-participant change in the outcome. c′-path = remaining within-participant change in the outcome after adjusting for ΔM and Mavg. a*b-path = portion of within-participant outcome change statistically associated with mediator change (with 95% bootstrap confidence intervals).

1. The lower limit of the confidence interval was above zero (.0047), indicating a statistically significant indirect effect.
